# Supplementary material for: Natural history and prognostic factors for localised small bowel adenocarcinoma
Source: PubMed Central journal article supplement — ESMO Open. 2020 Nov 13;5(6):e000960. doi: 10.1136/esmoopen-2020-000960 (PMC7668374; doi:10.1136/esmoopen-2020-000960), 2020-11-13
Supplement: esmoopen-2020-000960supp004.pdf [file esmoopen-2020-000960supp004.pdf]

**Supplementary table 1:** Adjuvant treatment

| Adjuvant Treatment                                              | No (%)     |
|-----------------------------------------------------------------|------------|
| <b>ALL</b>                                                      | 137 (100%) |
| <b>Chemotherapy</b>                                             |            |
| Fluoropyrimidine <sup>a</sup>                                   | 39 (28%)   |
| Fluoropyrimidine/platinum <sup>b</sup>                          | 67 (49%)   |
| Fluoropyrimidine/irinotecan                                     | 1 (1%)     |
| Other 5Fu combinations <sup>c</sup>                             | 8 (6%)     |
| Gemcitabine                                                     | 1 (1%)     |
| Unknown                                                         | 3 (2%)     |
| <b>Chemoradiation</b>                                           |            |
| Fluoropyrimidine                                                | 4 (3%)     |
| <b>Chemotherapy +Chemoradiation</b>                             |            |
| Fluoropyrimidine/platinum <sup>d</sup><br>+Fluoropyrimidine XRT | 9 (7%)     |
| Fluoropyrimidine +Fluoropyrimidine XRT                          | 2 (1%)     |
| Fluoropyrimidine/Irinotecan<br>+Fluoropyrimidine XRT            | 1 (1%)     |
| Gemcitabine<br>+Fluoropyrimidine XRT                            | 2 (1%)     |

<sup>a</sup> Fluoropyrimidine: 5FU or capecitabine

<sup>b</sup> Platinum: oxaliplatin (65), cisplatin (1), carboplatin (1)

<sup>c</sup> Other 5FU combinations: +Levamisole (3); +MMC (2); +IFN (1); +Etoposide/ Cisplatin (1); +MMC/Doxorubicin

<sup>d</sup> Platinum: oxaliplatin (8), cisplatin (1)

**Supplementary table 2:** Neoadjuvant treatment

| <b>Neoadjuvant Therapy<sup>d</sup></b>                          | <b>No (%)</b> |
|-----------------------------------------------------------------|---------------|
| <b>ALL</b>                                                      | 22 (100%)     |
| <b>Chemotherapy</b>                                             |               |
| Fluoropyrimidine <sup>a</sup> /platinum <sup>b</sup>            | 5 (23%)       |
| Other 5FU combinations (ECF)                                    | 1 (4%)        |
| Gemcitabine/Paclitaxel                                          | 1 (4%)        |
| <b>Chemoradiation</b>                                           |               |
| Fluoropyrimidine XRT                                            | 9 (41%)       |
| Fluoropyrimidine/platinum <sup>c</sup> XRT                      | 1 (4%)        |
| <b>Chemotherapy +Chemoradiation</b>                             |               |
| Fluoropyrimidine/platinum <sup>b</sup><br>+Fluoropyrimidine XRT | 5 (23%)       |
| Neoadjuvant treatment only                                      | 14 (63%)      |
| Neoadjuvant treatment<br>+Adjuvant chemotherapy                 | 6 (27%)       |
| Neoadjuvant treatment<br>+Adjuvant chemoradiation               | 2 (10%)       |

<sup>a</sup> Fluoropyrimidine: 5FU or Capecitabine

<sup>b</sup> Platinum: Oxaliplatin

<sup>c</sup> Platinum: Cisplatin

**Supplementary table 3:** Univariate and multivariate logistic regression for loco-regional recurrence (LR), and distant metastatic recurrence (DR)

|                        |                     | Loco-regional recurrence (LR) <sup>1</sup> |              |                                  |             | Distant metastatic recurrence (DR) <sup>1</sup> |             |                                  |             |
|------------------------|---------------------|--------------------------------------------|--------------|----------------------------------|-------------|-------------------------------------------------|-------------|----------------------------------|-------------|
|                        |                     | Univariate Logistic Regression             |              | Multivariate Logistic Regression |             | Univariate Logistic Regression                  |             | Multivariate Logistic Regression |             |
| Category               | Predictor           | OR<br>(95% CI for OR)                      | P-<br>value  | OR<br>(95% CI for OR)            | P-<br>value | OR<br>(95% CI for OR)                           | P-<br>value | OR<br>(95% CI for OR)            | P-<br>value |
| Age                    | ≥ 58                | 1                                          |              | 1                                |             | 1                                               |             | 1                                |             |
|                        | < 58                | 0.49 (0.23-1.05)                           | 0.07         | 0.41 (0.18-0.92)                 | <b>0.03</b> | 2.54 (0.92-7.04)                                | <b>0.08</b> | 2.98 (0.998-8.88)                | 0.05        |
| Gender                 | Male                |                                            |              |                                  |             | 1                                               |             |                                  |             |
|                        | Female              | 0.73 (0.33-1.59)                           | 0.43         |                                  |             | 1.84 (0.63-5.41)                                | 0.27        |                                  |             |
| Race                   | White               | 1                                          |              | 1                                |             | 1                                               |             |                                  |             |
|                        | Others <sup>2</sup> | 0.21 (0.05-0.94)                           | <b>0.04</b>  | 0.17 (0.04-0.79)                 | <b>0.02</b> | 21755713.48 (0-Inf)                             | 0.99        |                                  |             |
| Primary Tumor Location | Duodenum            | 1                                          |              |                                  |             | 1                                               |             |                                  |             |
|                        | Jejunum             | 1.40 (0.59-3.33)                           | 0.45         |                                  |             | 0.4 (0.13-1.21)                                 | 0.10        |                                  |             |
|                        | Ileum               | 1.11 (0.43-2.87)                           | 0.83         |                                  |             | 0.81 (0.21-3.10)                                | 0.76        |                                  |             |
| MSI Status             | dMMR                | 1                                          |              |                                  |             | 1                                               |             |                                  |             |
|                        | pMMR                | 0.12 (0.03-0.5)                            | <b>0.004</b> |                                  |             | 5.71 (1.42-22.98)                               | <b>0.01</b> |                                  |             |
| IBD                    | No                  | 1                                          |              |                                  |             | 1                                               |             |                                  |             |
|                        | Yes                 | 2.29 (0.79-6.59)                           | 0.12         |                                  |             | 0.67 (0.17-2.58)                                | 0.56        |                                  |             |
| Pathologic Stage       | Stage 1-2           | 1                                          |              |                                  |             | 1                                               |             |                                  |             |
|                        | Stage 3             | 0.65 (0.31-1.37)                           | 0.26         |                                  |             | 1.96 (0.73-5.21)                                | 0.18        |                                  |             |
| T stage                | T1/T2               | 1                                          |              |                                  |             | 1                                               |             |                                  |             |
|                        | T3                  | 0.28 (0.06-1.25)                           | 0.10         |                                  |             | 1.16 (0.13-10.63)                               | 0.90        |                                  |             |
|                        | T4                  | 0.37 (0.08-1.64)                           | 0.19         |                                  |             | 0.76 (0.08-6.8)                                 | 0.80        |                                  |             |
| Margin status          | R0                  | 1                                          |              |                                  |             | 1                                               |             |                                  |             |
|                        | R1                  | 0 (0-Inf)                                  | 0.99         |                                  |             | 7658066.22 (0-Inf)                              | 0.99        |                                  |             |
| Histologic Grade       | Grade 1-2           | 1                                          |              |                                  |             | 1                                               |             |                                  |             |
|                        | Grade 3             | 0.52 (0.23-1.17)                           | 0.11         |                                  |             | 1.73 (0.61-4.94)                                | 0.31        |                                  |             |

|                          |                            |                  |              |                  |              |                  |      |  |  |
|--------------------------|----------------------------|------------------|--------------|------------------|--------------|------------------|------|--|--|
| Perineural invasion      | No                         | 1                |              | 1                |              | 1                |      |  |  |
|                          | Yes                        | 3.35 (1.5-7.49)  | <b>0.004</b> | 3.58 (1.52-8.42) | <b>0.004</b> | 0.68 (0.23-1.95) | 0.47 |  |  |
| Lympho-vascular invasion | No                         | 1                |              |                  |              | 1                |      |  |  |
|                          | Yes                        | 2.39 (1.11-5.13) | <b>0.03</b>  |                  |              | 0.74 (0.28-1.94) | 0.55 |  |  |
| Perioperative treatment  | No perioperative treatment | 1                |              |                  |              | 1                |      |  |  |
|                          | Adjuvant                   | 1.87 (0.79-4.43) | 0.16         |                  |              | 0.33 (0.09-1.22) | 0.09 |  |  |
|                          | Neoadjuvant (+/-Adjuvant)  | 1.03 (0.19-5.66) | 0.97         |                  |              | 0.63 (0.06-6.73) | 0.70 |  |  |
| Radiation therapy        | No                         | 1                |              |                  |              | 1                |      |  |  |
|                          | Yes                        | 1.01 (0.32-3.21) | 0.99         |                  |              | 0.76 (0.19-3.06) | 0.70 |  |  |

<sup>1</sup>Total number of relapsed patients is 145

<sup>2</sup>Others= Black, Hispanic, and other races.
