# Supplementary figures and images for: Natural history and prognostic factors for localised small bowel adenocarcinoma
Source: PubMed Central journal article supplement — ESMO Open. 2020 Nov 13;5(6):e000960. doi: 10.1136/esmoopen-2020-000960 (PMC7668374; doi:10.1136/esmoopen-2020-000960), 2020-11-13

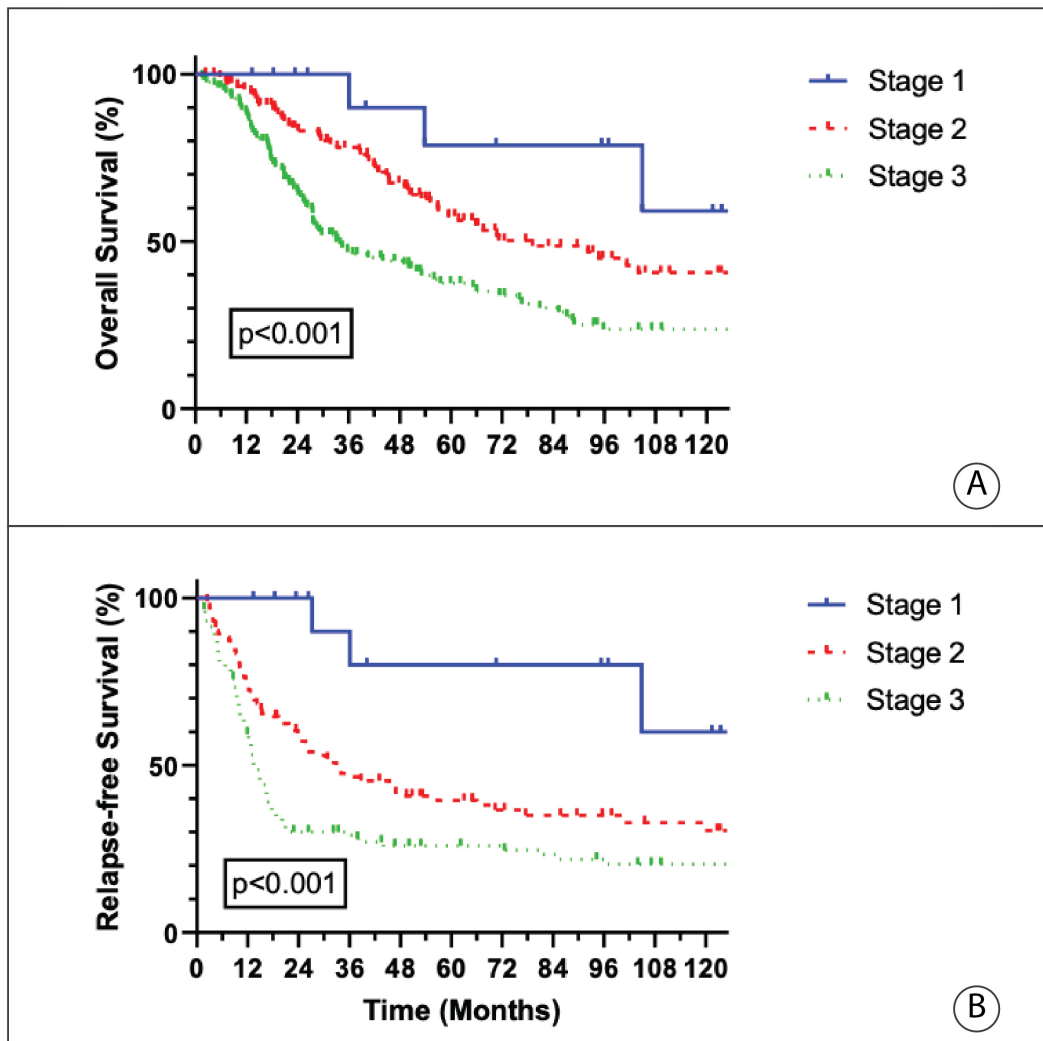

Supplement: esmoopen-2020-000960supp001.pdf [file esmoopen-2020-000960supp001.pdf]

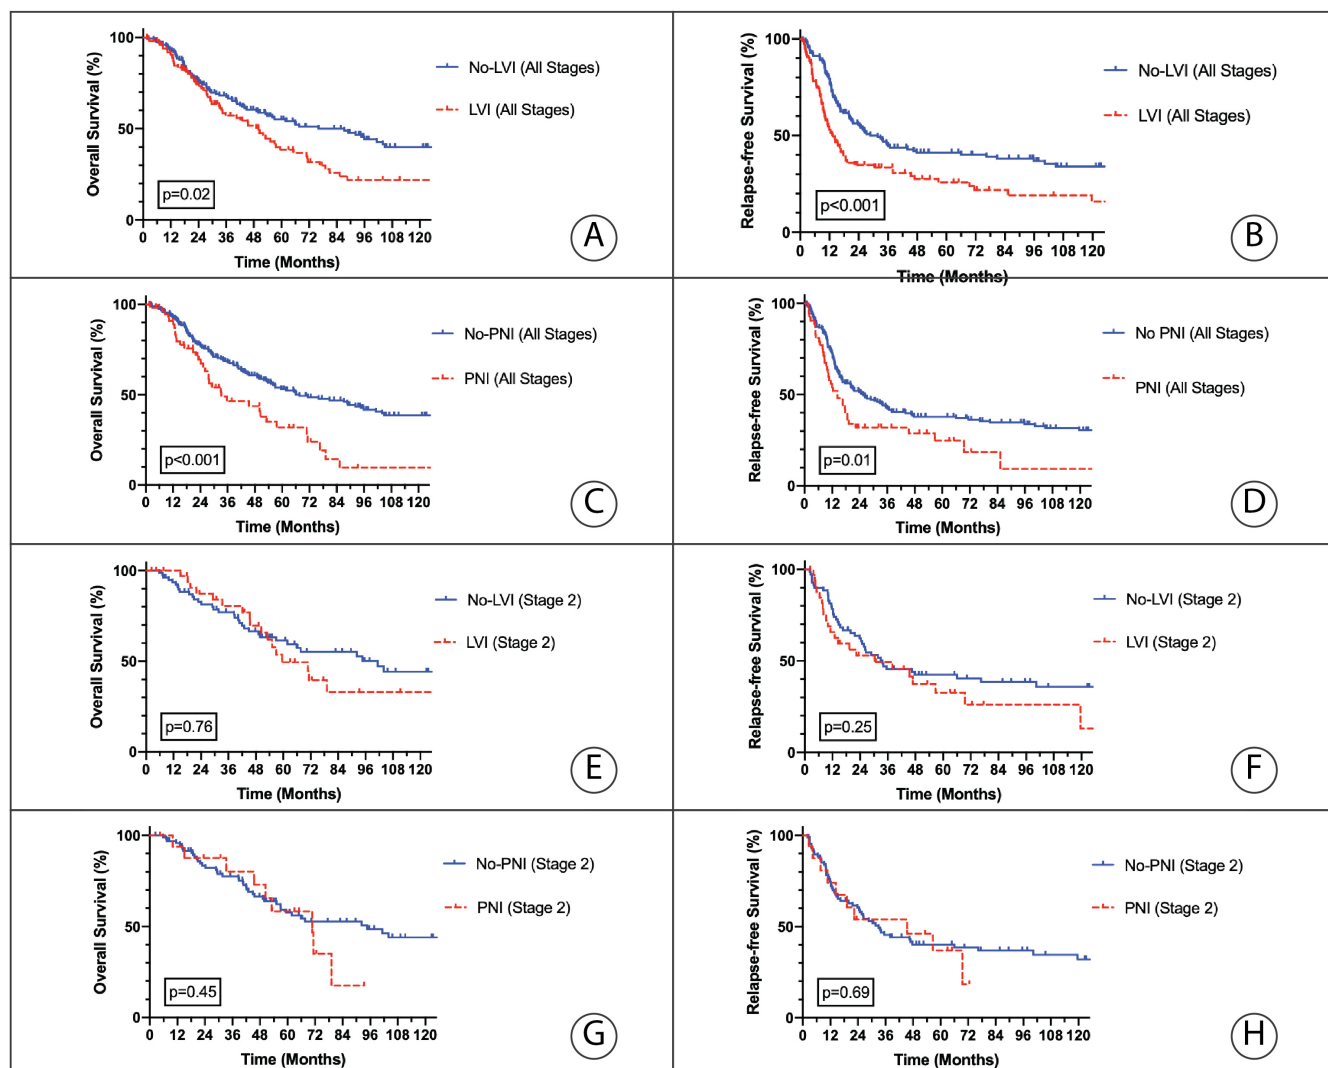

Supplement: esmoopen-2020-000960supp002.pdf [file esmoopen-2020-000960supp002.pdf]

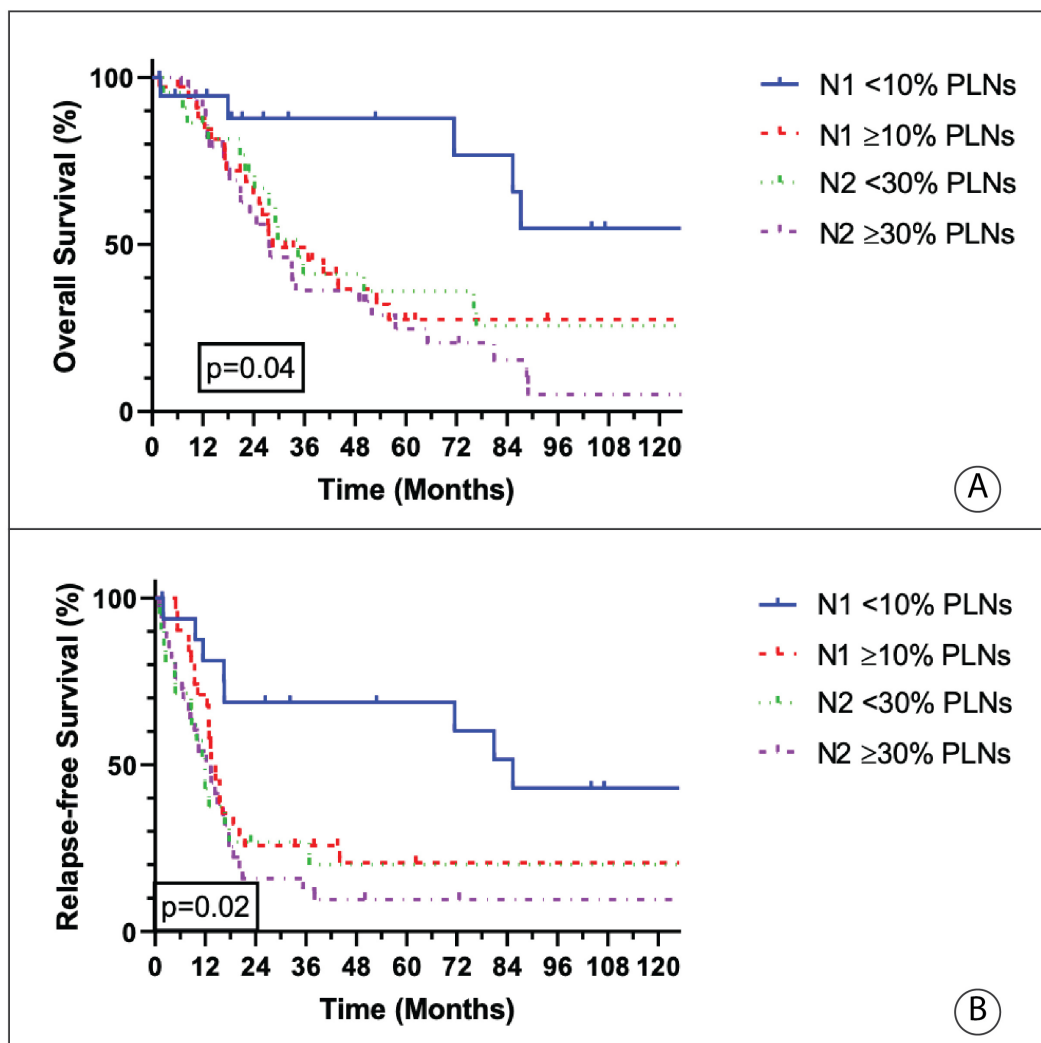

Supplement: esmoopen-2020-000960supp003.pdf [file esmoopen-2020-000960supp003.pdf]

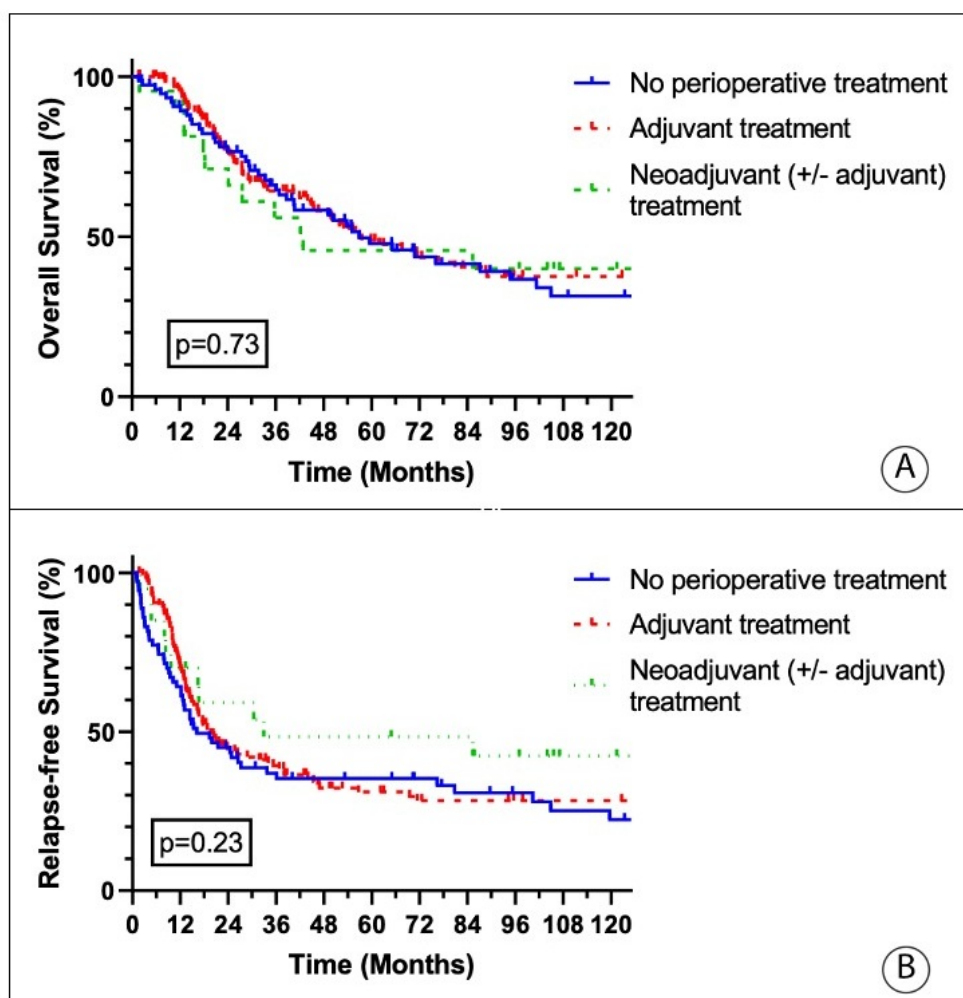

Supplement: esmoopen-2020-000960supp005.pdf [file esmoopen-2020-000960supp005.pdf]

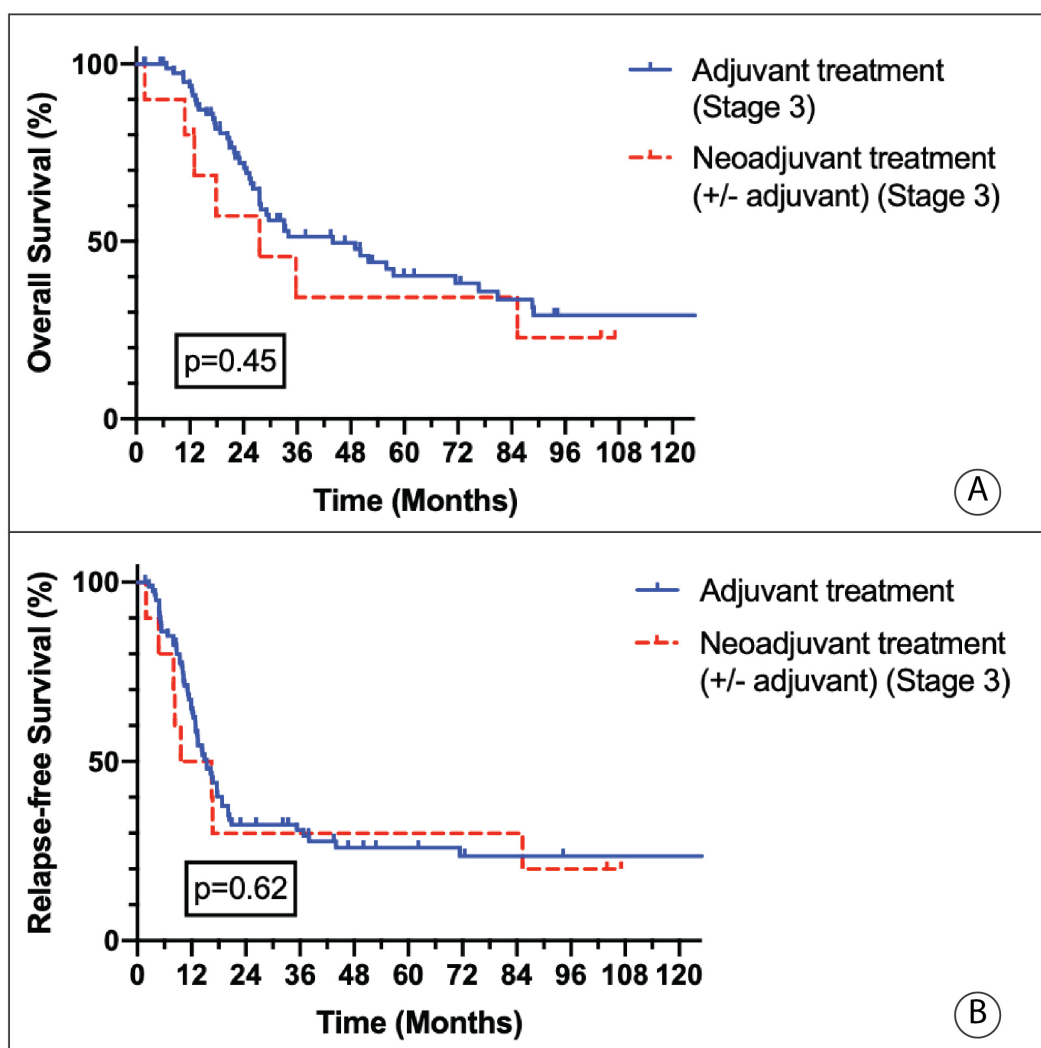

Supplement: esmoopen-2020-000960supp006.pdf [file esmoopen-2020-000960supp006.pdf]
